# Supplementary material for: Identification and validation of genomic regions influencing kernel zinc and iron in maize
Source: PubMed Central journal article supplement (PMC6004279; doi:10.1007/s00122-018-3089-3), 2018-03-24
Supplement: 122_2018_3089_MOESM1_ESM.pdf [file 122_2018_3089_MOESM1_ESM.pdf]

## Theoretical and Applied Genetics

Vemuri Hindu, Natalia Palacios-Rojas, Raman Babu, Willy B.Suwarno, Zerka Rashid, Rayalcheruvu Usha, Saykhedkar Gajanan R, Sudha K Nair\*

\*Corresponding Authors e-mail Id: [sudha.nair@cgiar.org](mailto:sudha.nair@cgiar.org)

Identification and validation of genomic regions influencing kernel Zinc and Iron in maize

**Table S1.** Phenotypic correlation coefficient between different environments for kernel Zn (above diagonal and Fe (below diagonal) at three locations.

| <b>Environment</b> | <b>AF12A</b> | <b>CE12B</b> | <b>AF13A</b> |
|--------------------|--------------|--------------|--------------|
| <b>AF12A</b>       | 1            | 0.65***      | 0.68***      |
| <b>CE12B</b>       | 0.62***      | 1            | 0.62***      |
| <b>AF13A</b>       | 0.68***      | 0.54***      | 1            |

AF12A- Agua Fria 2012, CE12B- Celaya 2013, AF13A- Agua Fria 2013, \*\*\* Indicates significance at 0.001
