# Supplementary material for: Identification and validation of genomic regions influencing kernel zinc and iron in maize
Source: PubMed Central journal article supplement (PMC6004279; doi:10.1007/s00122-018-3089-3), 2018-03-24
Supplement: 122_2018_3089_MOESM2_ESM.pdf [file 122_2018_3089_MOESM2_ESM.pdf]

## Theoretical and Applied Genetics

Vemuri Hindu, Natalia Palacios-Rojas, Raman Babu, Willy B.Suwarno, Zerka Rashid, Rayalcheruvu Usha, Saykhedkar Gajanan R, Sudha K Nair\*

\*Corresponding Authors e-mail Id: [sudha.nair@cgiar.org](mailto:sudha.nair@cgiar.org)

Identification and validation of genomic regions influencing kernel Zinc and Iron in maize

**Table S2.** Lines with Zn content higher than breeding target (33 µg/g)

| S.No | Pedigree                                                                                                                                  | BLUE_Zn (µg/g) | BLUE_Fe (µg/g) | Additional traits*                       |
|------|-------------------------------------------------------------------------------------------------------------------------------------------|----------------|----------------|------------------------------------------|
| 1    | KUIcarotenoidsyn-FS17-3-2-B-B-B-B-B-B-B-B                                                                                                 | 43.68          | 16.44          |                                          |
| 2    | SM-189-2                                                                                                                                  | 42.92          | 20.19          |                                          |
| 3    | (DTPYC9-F134-3-1-B)-B-B-B-B                                                                                                               | 40.29          | 18.88          | Drought tolerant background              |
| 4    | CML421                                                                                                                                    | 39.57          | 21.49          |                                          |
| 5    | CA02402/(24STE-5*24STE-17)-BBBB-###-B-3-B-1-BBB-B-B-B-B-B-B-B-B                                                                           | 39.41          | 18.6           |                                          |
| 6    | [[KILIMAST94A]-30/MSV-03-2-10-B-1-B-B-xP84c1F26-2-2-6-B-3-B]F17-1-2-1-1xP43C9-1-1-1-1-1-BBBB-1-xP84c1F26-2-2-6-B-3-B]-2-2-BxCML486]-1-1-B | 38.24          | 16.4           |                                          |
| 7    | (CML329/MBRC3AmF25-2-1-1-B-B-B)-B-B-B-B                                                                                                   | 38.22          | 14.97          |                                          |
| 8    | CML361                                                                                                                                    | 37.95          | 18.3           | Acid soil tolerant                       |
| 9    | SM-189-67                                                                                                                                 | 36.77          | 25.65          | Susceptible to Low N                     |
| 10   | SM-189-22                                                                                                                                 | 36.74          | 17.73          |                                          |
| 11   | CML192                                                                                                                                    | 36.39          | 15.62          | QPM                                      |
| 12   | (AMATLC0HS71-1-1-2-1-1-1-BBBB-B-B-B)-B-B-B-B                                                                                              | 36.28          | 19.7           | Acid soil tolerant background            |
| 13   | SM-189-23                                                                                                                                 | 36.19          | 17.25          |                                          |
| 14   | CML166                                                                                                                                    | 36.04          | 17.18          | QPM                                      |
| 15   | DTPYC9-F38-4-3-1-1-B                                                                                                                      | 35.88          | 15.02          | Susceptible to drought                   |
| 16   | DTPWC9-F18-1-3-1-2-B-B-B-1                                                                                                                | 35.82          | 16.28          | Susceptible to drought+ heat and to heat |

| S.No | Pedigree                                                                                                                                                                                   | BLUE_Zn<br>(µg/g) | BLUE_Fe<br>(µg/g) | Additional traits*                             |
|------|--------------------------------------------------------------------------------------------------------------------------------------------------------------------------------------------|-------------------|-------------------|------------------------------------------------|
| 17   | (MAS[206/312]-23-2-1-1-B-B-B/[BETASYN]BC1-6-1-1-1-1)-B-B-B-B                                                                                                                               | 35.81             | 17.86             |                                                |
| 18   | MBRC6BcF280-2-B-#-1-1-B-B-B-B-B-B-B                                                                                                                                                        | 35.65             | 22.28             | Susceptible to drought, heat and drought+ heat |
| 19   | (CML445/[BETASYN]BC1-9-2-3-1-1)-B-B-B                                                                                                                                                      | 35.6              | 16.86             |                                                |
| 20   | RO452W                                                                                                                                                                                     | 35.42             | 16.59             | QPM                                            |
| 21   | DTPWC9-F18-1-3-1-1-B                                                                                                                                                                       | 35.4              | 19.59             | Tolerant to Low N                              |
| 22   | CKL05019                                                                                                                                                                                   | 35.29             | 14.83             | Susceptible to Low N                           |
| 23   | CNO7/8-178                                                                                                                                                                                 | 35.26             | 17.45             |                                                |
| 24   | (TX03-1035-55-B)-B-B-B-B                                                                                                                                                                   | 35.24             | 21.09             |                                                |
| 25   | CNO7/8-258                                                                                                                                                                                 | 35.17             | 14.94             |                                                |
| 26   | [CML144/[CML144/CML395]F2-8sx]-1-2-3-2-B*5-1                                                                                                                                               | 35.14             | 17.53             | Susceptible to drought, heat and drought+ heat |
| 27   | CLYN261                                                                                                                                                                                    | 35.01             | 12.62             |                                                |
| 28   | (KUIcarotenoidsyn-FS17-3-2-B-B-B/(KU1409/DE3/KU1409)S2-18-2-B)-B-1(MAS:L4H1)-2-B-B-B                                                                                                       | 34.88             | 17.68             |                                                |
| 29   | BO163W                                                                                                                                                                                     | 34.67             | 14                | QPM                                            |
| 30   | DTPWC9-F115-1-4-1-1-B-B-B-B                                                                                                                                                                | 34.65             | 17.07             |                                                |
| 31   | ([CML226x[CATETODC1276/7619]]F2-25-1-B*7/CarotenoidSyn3-FS8-4-2-B-B//KUIcarotenoidsyn-FS11-1-1-B-B-B)/([CML226x[CATETODC1276/7619]]F2-25-1-B*7/CarotenoidSyn3-FS8-4-2-B-B//CML300)-2-3-B-B | 34.65             | 19.4              |                                                |
| 32   | (KUIcarotenoidsyn-FS11-1-1-B-B-B/(KU1409/DE3/KU1409)S2-18-2-B)-B-1(MAS:L4H1)-1-B-B-B                                                                                                       | 34.64             | 16.53             |                                                |
| 33   | (CML451//CML451/CML300)/(CML451/CML300//CML297)-16-1-B-B-B                                                                                                                                 | 34.58             | 15.93             |                                                |

| S.No | Pedigree                                                                                                                            | BLUE_Zn<br>(µg/g) | BLUE_Fe<br>(µg/g) | Additional traits*                                |
|------|-------------------------------------------------------------------------------------------------------------------------------------|-------------------|-------------------|---------------------------------------------------|
| 34   | NC486/(NC486/KUIcarotenoidsyn-FS17-3-2-B-B//KUIcarotenoidsyn-FS11-1-1-B-B-B)-14-3-B-B                                               | 34.53             | 22.28             |                                                   |
| 35   | P147-#136-5-1-B-1-BBB-B                                                                                                             | 34.52             | 19.97             | Tolerant to Drought+heat                          |
| 36   | DTPYC9-F13-2-1-1-2-B-B-1                                                                                                            | 34.46             | 20.29             | Tolerant to Drought+heat                          |
| 37   | (ZM305/[BETASYN]BC1)-29-3-4-B-B-B-B-B-B-B-B                                                                                         | 34.43             | 14.69             |                                                   |
| 38   | (MIRTC4AmF17-B-2-1-B-B)-B-B-B-B                                                                                                     | 34.4              | 15.89             |                                                   |
| 39   | (CarotenoidSyn3-FS5-1-5-B-B/CML353//CML486)-6-1-B-B-B-B                                                                             | 34.38             | 18.98             |                                                   |
| 40   | (KUI3-B-B-B-B)-B-B-B-B                                                                                                              | 34.32             | 19.75             |                                                   |
| 41   | [[GQL5/[GQL5/CML202]F2-1sx]-3-1-2-B/[BETASYN]BC1-2-3-1/KUI+SC55SYN#]-B-B-B-12-B-B-B                                                 | 33.93             | 13.93             | QPM background                                    |
| 42   | ([ZM305/BETASYN]BC2-273-1-1-B-B)-B-B-B-B                                                                                            | 33.86             | 12.85             |                                                   |
| 43   | [CML226x[CATETODC1276/7619]]F2-25-1-B*7-B/([CML226x[CATETODC1276/7619]]F2-25-1-B*7/KUIcarotenoidsyn-FS17-3-3-B-B//CML300)-2-1-B-B-B | 33.83             | 22.11             |                                                   |
| 44   | SM-189-31                                                                                                                           | 33.65             | 16.43             |                                                   |
| 45   | [200-7xMAIZSANANDRES-F1-B-xP84c1F26-2-2-4-B-2-B]F93-3-2-1-3xP43C9-1-1-1-1-1-BBBB-1-xP84c1F26-2-2-6-B-3-B]-1-1-BxCML486]-1-1-B       | 33.61             | 14.49             | Susceptible to drought and to Low N               |
| 46   | (SAM4(Angola)/[BETASYN]BC1-56-1-1-B-B-B)-B-B-B-B                                                                                    | 33.6              | 18.59             |                                                   |
| 47   | CNO7/8-156                                                                                                                          | 33.57             | 17.14             |                                                   |
| 48   | [ZM305/BETASYN]BC2-133-1-2-B-B-B-B-B-B-B-B                                                                                          | 33.48             | 16.27             |                                                   |
| 49   | KUIcarotenoidsyn-FS11-1-1-B-B-B-B-B-B-B-B                                                                                           | 33.45             | 18.64             |                                                   |
| 50   | DTPYC9-F38-4-3-1-2-B-B-B-B                                                                                                          | 33.32             | 16.35             | Tolerant to drought, susceptible to heat and DT+H |
| 51   | (CML451//CML451/CML305)/(CML451/CML305//CML300)-1-1-B-B-B                                                                           | 33.31             | 18.02             |                                                   |
| 52   | VL05552                                                                                                                             | 33.29             | 17.13             | Tolerant to Low N                                 |

| <b>S.No</b> | <b>Pedigree</b>                                                                                   | <b>BLUE_Zn<br/>(µg/g)</b> | <b>BLUE_Fe<br/>(µg/g)</b> | <b>Additional traits*</b>                                 |
|-------------|---------------------------------------------------------------------------------------------------|---------------------------|---------------------------|-----------------------------------------------------------|
| 53          | (CML510//CML510/DTPYC9-F69-3-1-1-1-B-B-B-B)/(CML510/DTPYC9-F69-3-1-1-1-B-B-B-B//CML297)-2-1-B-B-B | 33.24                     | 16.85                     | Drought tolerant background                               |
| 54          | [CLQ06901xB113]-F2)-01-05-K1-B-B-B                                                                | 33.12                     | 13.9                      | QPM background                                            |
| 55          | CL-RCW87=(CL-04321xCML401)-B-19-2-1-BB-B-B                                                        | 33.04                     | 20.4                      | Tolerant to heat, susceptible to drought and drought+heat |
| 56          | VL054178                                                                                          | 33.03                     | 14.24                     |                                                           |
| 57          | SM-189-56                                                                                         | 33.03                     | 17.01                     | Susceptible to Low N                                      |

\* (Cairns et al. 2013) ; CIMMYT maize lines catalog ([www.CIMMYT.org](http://www.CIMMYT.org)); Das et al. 2017 (submitted), information from breeders and physiologists at CIMMYT.
