# Supplementary material for: Identification and validation of genomic regions influencing kernel zinc and iron in maize
Source: PubMed Central journal article supplement (PMC6004279; doi:10.1007/s00122-018-3089-3), 2018-03-24
Supplement: 122_2018_3089_MOESM3_ESM.pdf [file 122_2018_3089_MOESM3_ESM.pdf]

## Theoretical and Applied Genetics

Vemuri Hindu, Natalia Palacios-Rojas, Raman Babu, Willy B.Suwarno, Zerka Rashid, Rayalcheruvu Usha, Saykhedkar Gajanan R, Sudha K

Nair\*

\*Corresponding Authors e-mail Id: [sudha.nair@cgiar.org](mailto:sudha.nair@cgiar.org)

Identification and validation of genomic regions influencing kernel Zinc and Iron in maize

**Table S3.** Significantly associated SNPs for kernel Zn and Fe concentration identified in GWAS. Chromosomal locations along with effect sizes and predicted gene models (B73 AGPV2) are depicted.

| Trait      | SNP          | Chr       | Physical Position (bp)* | P-Value  | R <sup>2</sup> (%) | FA** | FA Frequency | Gene Model    | Annotation                                                                             |
|------------|--------------|-----------|-------------------------|----------|--------------------|------|--------------|---------------|----------------------------------------------------------------------------------------|
| Zn         | S4_843777    | 4         | 843,777                 | 4.93E-06 | 2.27               | C    | 0.09         | GRMZM2G163427 | Protein_coding                                                                         |
|            | S4_843764    | 4         | 843,764                 | 4.93E-06 | 2.27               | A    | 0.09         |               |                                                                                        |
|            | S5_2521368   | 5         | 2,521,368               | 1.84E-05 | 2.00               | A    | 0.05         |               |                                                                                        |
|            | S5_2521372   | 5         | 2,521,372               | 1.84E-05 | 2.00               | G    | 0.05         | GRMZM2G160064 | Metal ion binding/metal ion transport/heavy metal-associated domain containing protein |
|            | S3_204998729 | 3         | 204,998,729             | 1.91E-05 | 1.99               | T    | 0.29         | GRMZM2G035276 | nucleoside-triphosphatase activity                                                     |
|            | S1_291258791 | 1         | 291,258,791             | 2.38E-05 | 1.94               | C    | 0.13         | GRMZM2G134227 | catalytic activity                                                                     |
|            | S8_80619983  | 8         | 80,619,983              | 2.58E-05 | 1.93               | A    | 0.09         | GRMZM2G311974 | Nac (No apical Meristem) domain transcriptional regulator super family protein         |
|            | S2_224173983 | 2         | 224,173,983             | 3.19E-05 | 1.88               | T    | 0.05         | GRMZM2G173377 | protein_coding                                                                         |
|            | S2_225529232 | 2         | 225,529,232             | 3.23E-05 | 1.88               | T    | 0.12         | GRMZM2G458075 | protein serine/threonine kinases                                                       |
|            | S1_22439336  | 1         | 22,439,336              | 3.26E-05 | 1.88               | A    | 0.10         | GRMZM2G077127 | hydrolase, alpha/beta fold family domain containing protein                            |
|            | S7_7277849   | 7         | 7,277,849               | 3.39E-05 | 1.87               | C    | 0.25         | GRMZM2G107309 | zinc ion binding/histone deacetylase                                                   |
|            | S1_22439335  | 1         | 22,439,335              | 3.48E-05 | 1.86               | G    | 0.10         | GRMZM2G077127 | hydrolase, alpha/beta fold family domain containing protein                            |
|            | S8_149148541 | 8         | 149,148,541             | 3.56E-05 | 1.86               | C    | 0.43         | GRMZM2G075058 | protein_coding/lipase class 3 family protein, putative, expressed                      |
|            | S7_7065627   | 7         | 7,065,627               | 3.58E-05 | 1.86               | A    | 0.10         | GRMZM2G398996 | serine-type endopeptidase activity/gibberellin receptor GID1L2                         |
|            | S7_7277737   | 7         | 7,277,737               | 3.91E-05 | 1.84               | G    | 0.28         | GRMZM2G107309 | zinc ion binding/histone deacetylase                                                   |
| S7_7277776 | 7            | 7,277,776 | 3.91E-05                | 1.84     | A                  | 0.28 |              |               |                                                                                        |

| Trait        | SNP           | Chr         | Physical Position (bp)* | P-Value  | R <sup>2</sup> (%) | FA** | FA Frequency  | Gene Model                                           | Annotation                                                |
|--------------|---------------|-------------|-------------------------|----------|--------------------|------|---------------|------------------------------------------------------|-----------------------------------------------------------|
|              | S8_125472630  | 8           | 125,472,630             | 3.95E-05 | 1.84               | C    | 0.13          | GRMZM2G048200                                        | GDSL-like lipase/acylhydrolase                            |
|              | S10_54119964  | 10          | 54,119,964              | 4.62E-05 | 1.81               | G    | 0.58          | GRMZM2G073371                                        | metal ion binding//superoxide dismutase activity          |
|              | S4_161165956  | 4           | 161,165,956             | 4.63E-05 | 1.81               | A    | 0.25          | GRMZM2G406737                                        | -                                                         |
|              | S9_136389202  | 9           | 136,389,202             | 5.03E-05 | 1.79               | T    | 0.28          | GRMZM2G489070                                        | -                                                         |
| Fe           | S1_64238426   | 1           | 64,238,426              | 2.43E-06 | 2.41               | A    | 0.07          | GRMZM2G147698                                        | myb-like DNA-binding domain containing protein            |
|              | S9_136390177  | 9           | 136,390,177             | 4.54E-06 | 2.28               | T    | 0.13          | GRMZM2G489070                                        | -                                                         |
|              | S3_102989836  | 3           | 102,989,836             | 1.38E-05 | 2.05               | A    | 0.12          | GRMZM5G837123                                        | Expressed protein                                         |
|              | S3_224631400  | 3           | 224,631,400             | 1.68E-05 | 2.01               | A    | 0.04          | GRMZM2G034684                                        | Protein_coding                                            |
|              | S10_136070835 | 10          | 136,070,835             | 1.75E-05 | 2.01               | G    | 0.95          | GRMZM2G152076                                        | -                                                         |
|              | S3_186200393  | 3           | 186,200,393             | 1.78E-05 | 2.00               | G    | 0.05          | GRMZM2G312201                                        | pentatricopeptide                                         |
|              | S5_187810664  | 5           | 187,810,664             | 2.09E-05 | 1.97               | G    | 0.39          | GRMZM2G461034                                        | F box and DUF domain containing protein                   |
|              | S5_14804657   | 5           | 14,804,657              | 2.21E-05 | 1.96               | T    | 0.89          | GRMZM2G010146                                        | ER to Golgi vesicle-mediated transport                    |
|              | S8_167086477  | 8           | 167,086,477             | 2.36E-05 | 1.94               | A    | 0.75          | GRMZM2G162329                                        | homoiothermy/ structural constituent of cell wall/S-layer |
|              | S1_275647011  | 1           | 275,647,011             | 2.37E-05 | 1.94               | A    | 0.14          | GRMZM2G131629                                        | protein serine/threonine kinase activity                  |
|              | S1_64238509   | 1           | 64,238,509              | 2.71E-05 | 1.92               | A    | 0.07          | GRMZM2G147698                                        | myb-like DNA-binding domain containing protein            |
|              | S1_81549746   | 1           | 81,549,746              | 2.82E-05 | 1.91               | C    | 0.63          | GRMZM2G302373                                        | glutathione S-transferase                                 |
|              | S8_164741044  | 8           | 164,741,044             | 2.89E-05 | 1.90               | C    | 0.96          | GRMZM2G472991                                        | protein serine/threonine kinase activity                  |
|              | S5_5104719    | 5           | 5,104,719               | 3.16E-05 | 1.88               | C    | 0.04          | GRMZM2G016756                                        | phytochrome-interacting factor 4                          |
|              | S1_279877918  | 1           | 279,877,918             | 3.24E-05 | 1.88               | A    | 0.88          | AC186902.4_FGT001                                    | -                                                         |
|              | S8_164741133  | 8           | 164,741,133             | 3.38E-05 | 1.87               | G    | 0.97          | GRMZM2G472991                                        | protein serine/threonine kinase activity                  |
|              | S8_67381104   | 8           | 67,381,104              | 3.47E-05 | 1.87               | C    | 0.77          | GRMZM2G027546                                        | ubiquitin-conjugating enzyme domain containing protein    |
|              | S4_167189737  | 4           | 167,189,737             | 3.48E-05 | 1.86               | T    | 0.13          | GRMZM2G168369                                        | Zinc finger C3HC4 TYPE(RING FINGER) family protein        |
|              | S5_207514452  | 5           | 207,514,452             | 3.77E-05 | 1.85               | T    | 0.10          | GRMZM2G036418                                        | MAG2, putative,                                           |
|              | S10_81182541  | 10          | 81,182,541              | 4.43E-05 | 1.82               | G    | 0.93          | GRMZM2G123410                                        | OsFBX261 - F-box domain containing protein                |
| S9_139191545 | 9             | 139,191,545 | 4.57E-05                | 1.81     | G                  | 0.19 | GRMZM2G305027 | Core histone H2A/H2B/H3/H4 domain containing protein |                                                           |

| Trait | SNP          | Chr | Physical Position (bp)* | P-Value  | R <sup>2</sup> (%) | FA** | FA Frequency | Gene Model        | Annotation                                           |
|-------|--------------|-----|-------------------------|----------|--------------------|------|--------------|-------------------|------------------------------------------------------|
|       | S7_168921933 | 7   | 168,921,933             | 4.60E-05 | 1.81               | A    | 0.07         | GRMZM2G026991     | G-protein coupled receptor protein signaling pathway |
|       | S8_93112257  | 8   | 93,112,257              | 4.60E-05 | 1.81               | A    | 0.55         | AC206644.4_FGT003 | -                                                    |
|       | S1_3741991   | 1   | 3,741,991               | 4.64E-05 | 1.81               | T    | 0.21         | GRMZM2G030567     | protein_coding                                       |
|       | S4_230884639 | 4   | 230,884,639             | 4.66E-05 | 1.80               | T    | 0.10         | GRMZM2G080056     | pectate lyase activity                               |
|       | S1_81549744  | 1   | 81,549,744              | 4.77E-05 | 1.80               | A    | 0.63         | GRMZM2G302373     | glutathione S-transferase                            |

\* Physical positions were retrieved from maize B73 AGPV2, \*\*FA- Favourable Allele
